# Supplementary material for: Azidocryptands–synthesis, structure, and complexation properties
Source: Royal Society of Chemistry journal article supplement (doi:10.1039/b413395a), 2004-12-14
Supplement: b413395a.pdf [file b413395a.pdf]

**Supplementary material** to Ms. “Azidocryptands – Synthesis, Structure, and Complexation Properties”

C. Tönshoff, K. Merz and G. Bucher

Calculated geometry (B3LYP / 6-31G(d)) of cryptand **1** (azido group pointing towards larger bridge)

|   |           |           |           |
|---|-----------|-----------|-----------|
| H | -1.173207 | 0.062585  | -4.978581 |
| C | -0.887230 | -0.258675 | -3.981075 |
| C | -0.166248 | -1.179494 | -1.455028 |
| C | 0.460406  | -0.329567 | -3.621369 |
| C | -1.862893 | -0.516748 | -3.019447 |
| C | -1.529150 | -0.946052 | -1.729988 |
| C | 0.838230  | -0.758304 | -2.350633 |
| H | 1.230158  | -0.024974 | -4.327344 |
| H | -2.912512 | -0.355319 | -3.257062 |
| C | 2.259642  | -0.609869 | -1.830456 |
| H | 2.938818  | -0.380939 | -2.672858 |
| H | 2.605057  | -1.549132 | -1.389532 |
| C | -2.569945 | -0.933320 | -0.619393 |
| H | -3.566644 | -0.783067 | -1.073334 |
| H | -2.625869 | -1.889587 | -0.092176 |
| N | 2.287247  | 0.420689  | -0.787839 |
| N | -2.236507 | 0.108689  | 0.364733  |
| C | -2.471545 | 1.471716  | -0.116129 |
| H | -3.351636 | 1.919573  | 0.381392  |
| H | -2.707591 | 1.432004  | -1.184403 |
| C | -1.286206 | 2.427571  | 0.044897  |
| H | -0.937750 | 2.451691  | 1.082900  |
| O | -0.238015 | 2.005329  | -0.804389 |
| C | 2.096898  | 1.787528  | -1.262729 |
| H | 3.038232  | 2.366079  | -1.231193 |
| H | 1.781226  | 1.761712  | -2.310085 |
| C | 1.024690  | 2.548939  | -0.483430 |
| H | 1.071269  | 3.621475  | -0.749762 |
| H | 1.211023  | 2.468497  | 0.599200  |
| C | 3.257575  | 0.284086  | 0.285299  |
| H | 4.297527  | 0.147993  | -0.082878 |
| H | 3.258796  | 1.229659  | 0.839567  |
| C | 2.984149  | -0.855332 | 1.282695  |
| H | 3.799919  | -0.861258 | 2.025998  |
| H | 3.010449  | -1.820158 | 0.766114  |
| O | 1.721470  | -0.809835 | 1.920260  |
| C | -2.675588 | -0.155755 | 1.727545  |
| H | -2.446506 | -1.200405 | 1.959251  |
| H | -3.773017 | -0.030816 | 1.861350  |
| C | -2.013489 | 0.745871  | 2.786765  |
| H | -2.324438 | 0.393412  | 3.782380  |
| H | -2.386527 | 1.772020  | 2.685533  |
| O | -0.600687 | 0.830337  | 2.691179  |
| C | 1.603903  | -0.011427 | 3.078106  |
| H | 2.239773  | -0.407202 | 3.889887  |
| H | 1.900447  | 1.033183  | 2.896598  |
| C | 0.147427  | -0.041629 | 3.521936  |
| H | -0.217006 | -1.076253 | 3.455290  |
| H | 0.078367  | 0.282124  | 4.574732  |
| H | -1.619943 | 3.446830  | -0.226479 |
| N | 0.343131  | -1.786349 | -0.295453 |
| N | -0.317547 | -2.369938 | 0.552350  |
| N | -0.754083 | -2.977891 | 1.419594  |

B3LYP / 6-31G(d) : -1201.441654  
B3LYP / 6-31G(d) + ZPE: -1200.986711

Calculated geometry (B3LYP / 6-31G(d)) of cryptand 1xNa<sup>+</sup> (azido group pointing towards the larger bridge)

|    |           |           |           |
|----|-----------|-----------|-----------|
| H  | 0.659704  | 0.481040  | 5.006733  |
| C  | 0.435970  | 0.060807  | 4.031210  |
| C  | -0.174678 | -1.155214 | 1.625256  |
| C  | -0.845202 | 0.188486  | 3.492296  |
| C  | 1.452735  | -0.512417 | 3.264987  |
| C  | 1.172768  | -1.097654 | 2.027105  |
| C  | -1.164033 | -0.364754 | 2.245780  |
| H  | -1.601077 | 0.760346  | 4.025314  |
| H  | 2.477790  | -0.498748 | 3.626703  |
| C  | -2.378366 | 0.126570  | 1.460950  |
| H  | -3.082318 | 0.624127  | 2.145062  |
| H  | -2.936478 | -0.683146 | 0.984374  |
| C  | 2.263328  | -1.487660 | 1.040957  |
| H  | 3.231751  | -1.560917 | 1.556941  |
| H  | 2.049920  | -2.465949 | 0.604253  |
| N  | -1.917186 | 1.057433  | 0.383793  |
| N  | 2.315036  | -0.498593 | -0.081382 |
| C  | 2.956501  | 0.780256  | 0.299959  |
| H  | 3.948984  | 0.882388  | -0.165520 |
| H  | 3.115106  | 0.777242  | 1.381610  |
| C  | 2.129370  | 2.034648  | -0.033234 |
| H  | 2.013349  | 2.173635  | -1.118662 |
| O  | 0.847284  | 1.875265  | 0.572609  |
| C  | -1.457434 | 2.364771  | 0.914272  |
| H  | -2.227899 | 3.140805  | 0.792514  |
| H  | -1.273374 | 2.261793  | 1.985305  |
| C  | -0.149492 | 2.851736  | 0.279589  |
| H  | 0.122894  | 3.828994  | 0.702730  |
| H  | -0.249084 | 2.977733  | -0.812546 |
| C  | -2.848731 | 1.217613  | -0.751474 |
| H  | -3.884323 | 1.412778  | -0.420496 |
| H  | -2.526816 | 2.108078  | -1.303355 |
| C  | -2.879034 | 0.031359  | -1.730105 |
| H  | -3.521140 | 0.288833  | -2.581703 |
| H  | -3.306888 | -0.859455 | -1.260088 |
| O  | -1.572196 | -0.354688 | -2.182650 |
| C  | 2.786784  | -1.080547 | -1.350411 |
| H  | 2.284857  | -2.047045 | -1.468818 |
| H  | 3.874921  | -1.277833 | -1.347076 |
| C  | 2.493842  | -0.219566 | -2.592883 |
| H  | 2.770042  | -0.791196 | -3.486661 |
| H  | 3.100891  | 0.691569  | -2.590189 |
| O  | 1.121405  | 0.204910  | -2.674996 |
| C  | -1.136383 | 0.088245  | -3.469866 |
| H  | -1.776384 | -0.330657 | -4.258260 |
| H  | -1.167314 | 1.185299  | -3.540991 |
| C  | 0.291603  | -0.406031 | -3.670643 |
| H  | 0.321253  | -1.500389 | -3.577538 |
| H  | 0.632849  | -0.127541 | -4.676714 |
| H  | 2.641969  | 2.920807  | 0.367538  |
| N  | -0.431530 | -1.903515 | 0.424199  |
| N  | -1.475617 | -2.571064 | 0.354360  |
| N  | -2.382807 | -3.228821 | 0.158429  |
| Na | 0.062028  | 0.119232  | -0.678947 |

B3LYP / 6-31G(d): -1363.665638

B3LYP / 6-31G(d) + ZPE: -1363.207847

Calculated geometry (B3LYP / 6-31G(d)) of cryptand 1xLi<sup>+</sup> (azido group pointing towards larger bridge)

|    |           |           |           |
|----|-----------|-----------|-----------|
| H  | 0.574157  | 0.569657  | 5.087579  |
| C  | 0.398174  | 0.154524  | 4.100059  |
| C  | -0.075231 | -1.013894 | 1.644530  |
| C  | -0.880426 | 0.204101  | 3.540808  |
| C  | 1.467069  | -0.342819 | 3.350541  |
| C  | 1.249697  | -0.909347 | 2.091743  |
| C  | -1.133227 | -0.338115 | 2.274939  |
| H  | -1.685374 | 0.704098  | 4.073982  |
| H  | 2.479875  | -0.281330 | 3.740610  |
| C  | -2.381038 | 0.024907  | 1.481852  |
| H  | -3.110476 | 0.516947  | 2.143789  |
| H  | -2.887749 | -0.852974 | 1.069934  |
| C  | 2.368758  | -1.259006 | 1.129101  |
| H  | 3.342299  | -1.201255 | 1.637801  |
| H  | 2.252480  | -2.283574 | 0.766451  |
| N  | -1.993428 | 0.904683  | 0.342819  |
| N  | 2.313096  | -0.356936 | -0.058930 |
| C  | 2.831354  | 0.995775  | 0.236823  |
| H  | 3.857435  | 1.130933  | -0.140212 |
| H  | 2.871417  | 1.108988  | 1.322944  |
| C  | 1.937648  | 2.125408  | -0.299305 |
| H  | 2.006041  | 2.245713  | -1.387921 |
| O  | 0.603095  | 1.782987  | 0.066638  |
| C  | -1.596092 | 2.257779  | 0.780555  |
| H  | -2.430925 | 2.973989  | 0.725450  |
| H  | -1.283766 | 2.203936  | 1.825535  |
| C  | -0.405745 | 2.786553  | -0.021549 |
| H  | -0.051765 | 3.729803  | 0.415594  |
| H  | -0.660612 | 2.977135  | -1.075776 |
| C  | -2.963896 | 0.939475  | -0.762143 |
| H  | -4.007942 | 1.006976  | -0.409789 |
| H  | -2.771631 | 1.850473  | -1.339187 |
| C  | -2.834084 | -0.265181 | -1.697577 |
| H  | -3.494308 | -0.139167 | -2.564325 |
| H  | -3.127447 | -1.192417 | -1.197605 |
| O  | -1.477098 | -0.459133 | -2.127461 |
| C  | 2.873366  | -0.976202 | -1.267692 |
| H  | 2.477746  | -1.995662 | -1.320968 |
| H  | 3.975841  | -1.050052 | -1.239811 |
| C  | 2.483280  | -0.239700 | -2.553451 |
| H  | 2.723962  | -0.873879 | -3.414017 |
| H  | 3.038149  | 0.697943  | -2.669911 |
| O  | 1.080047  | 0.071796  | -2.539709 |
| C  | -1.124711 | 0.061509  | -3.409273 |
| H  | -1.776376 | -0.350873 | -4.190869 |
| H  | -1.213125 | 1.157638  | -3.422082 |
| C  | 0.312511  | -0.357566 | -3.667245 |
| H  | 0.377953  | -1.449166 | -3.768084 |
| H  | 0.677524  | 0.108960  | -4.591566 |
| H  | 2.232662  | 3.074126  | 0.169102  |
| N  | -0.256559 | -1.682983 | 0.381366  |
| N  | -1.169701 | -2.519455 | 0.288210  |
| N  | -1.956201 | -3.311346 | 0.070644  |
| Li | 0.080236  | 0.040292  | -0.775820 |

B3LYP / 6-31G(d): -1208.922024

B3LYP / 6-31G(d) + ZPE: -1208.462330

Calculated geometry (B3LYP / 6-31G(d)) of cryptand **1** (azido group pointing towards smaller bridge)

|   |           |           |           |
|---|-----------|-----------|-----------|
| H | 0.808865  | 3.995668  | -0.461784 |
| C | 0.388381  | 3.135459  | 0.051813  |
| C | -0.753262 | 1.084153  | 1.537645  |
| C | -0.899619 | 2.688246  | -0.252204 |
| C | 1.161012  | 2.403279  | 0.949921  |
| C | 0.630158  | 1.323640  | 1.668486  |
| C | -1.464193 | 1.616036  | 0.440699  |
| H | -1.470948 | 3.168890  | -1.043197 |
| H | 2.210071  | 2.655805  | 1.086743  |
| C | -2.655153 | 0.847458  | -0.113567 |
| H | -3.377491 | 1.524919  | -0.592052 |
| H | -3.186491 | 0.330011  | 0.687284  |
| C | 1.592944  | 0.320236  | 2.317159  |
| H | 2.433139  | 0.874055  | 2.759066  |
| H | 1.129252  | -0.236090 | 3.134075  |
| N | -2.132924 | -0.130124 | -1.092717 |
| N | 2.109196  | -0.647639 | 1.355051  |
| C | 3.327503  | -0.346277 | 0.637357  |
| H | 4.184270  | -0.942303 | 1.014724  |
| H | 3.574367  | 0.704677  | 0.811372  |
| C | 3.283243  | -0.573885 | -0.876987 |
| H | 3.183138  | -1.648476 | -1.108056 |
| H | 4.248896  | -0.245011 | -1.301828 |
| O | 2.206040  | 0.143483  | -1.435484 |
| C | 2.159036  | 0.106628  | -2.848487 |
| H | 2.889887  | 0.814724  | -3.275832 |
| H | 2.401339  | -0.898198 | -3.228724 |
| C | 0.758647  | 0.475375  | -3.302734 |
| H | 0.784184  | 0.794247  | -4.359394 |
| H | 0.402534  | 1.317091  | -2.694243 |
| O | -0.074158 | -0.664830 | -3.164537 |
| C | -2.251173 | 0.332491  | -2.465817 |
| H | -3.302033 | 0.328683  | -2.832555 |
| H | -1.928588 | 1.378769  | -2.485588 |
| C | -1.431156 | -0.450968 | -3.503510 |
| H | -1.513636 | 0.083069  | -4.466004 |
| H | -1.852233 | -1.449192 | -3.658674 |
| C | -2.397226 | -1.546621 | -0.892740 |
| H | -3.462835 | -1.824715 | -1.052957 |
| H | -1.822936 | -2.084585 | -1.652071 |
| C | -2.013252 | -2.128208 | 0.480357  |
| H | -2.124319 | -3.224806 | 0.400457  |
| H | -2.715496 | -1.787223 | 1.246974  |
| O | -0.745748 | -1.793625 | 0.999478  |
| C | 1.600619  | -2.003103 | 1.293674  |
| H | 1.281140  | -2.329809 | 2.294613  |
| H | 2.428085  | -2.665150 | 0.997937  |
| C | 0.416531  | -2.267979 | 0.340971  |
| H | 0.333906  | -3.356435 | 0.164389  |
| H | 0.561368  | -1.758289 | -0.618942 |
| N | -1.538698 | 0.303820  | 2.424735  |
| N | -1.163551 | 0.030093  | 3.561542  |
| N | -0.974701 | -0.284197 | 4.646587  |

B3LYP / 6-31G(d): -1201.426756  
B3LYP / 6-31G(d) + ZPE: -1200.972370

Calculated geometry (B3LYP / 6 -31G(d)) of cryptand **2**

|   |           |           |           |
|---|-----------|-----------|-----------|
| H | 4.736146  | -0.077481 | -1.175599 |
| C | 3.770663  | 0.318164  | -0.873277 |
| C | 1.333063  | 1.400072  | -0.105149 |
| C | 2.846886  | 0.719447  | -1.837101 |
| C | 3.436084  | 0.395903  | 0.478006  |
| C | 2.213837  | 0.934757  | 0.884626  |
| C | 1.590857  | 1.226210  | -1.477196 |
| H | 3.093088  | 0.628668  | -2.892389 |
| H | 4.136733  | 0.048636  | 1.233356  |
| C | 0.510870  | 1.422447  | -2.532718 |
| H | 0.985690  | 1.666878  | -3.499963 |
| H | -0.133005 | 2.272154  | -2.297433 |
| C | 1.826805  | 1.023140  | 2.350628  |
| H | 2.725632  | 0.863826  | 2.968470  |
| H | 1.481317  | 2.038718  | 2.566444  |
| N | -0.333850 | 0.219149  | -2.638232 |
| N | 0.754403  | 0.083185  | 2.702798  |
| C | 1.225007  | -1.224691 | 3.162198  |
| H | 1.090749  | -1.329553 | 4.256399  |
| H | 2.302393  | -1.296676 | 2.975794  |
| C | 0.575276  | -2.428434 | 2.473278  |
| H | -0.515440 | -2.365411 | 2.528761  |
| H | 0.887100  | -3.342934 | 3.006477  |
| O | 0.994458  | -2.501923 | 1.121993  |
| C | -0.075603 | -2.668967 | 0.200130  |
| H | -0.585965 | -3.633496 | 0.356130  |
| H | -0.812276 | -1.864949 | 0.305811  |
| C | 0.508696  | -2.605234 | -1.201278 |
| H | 1.183747  | -3.455440 | -1.395499 |
| H | 1.087758  | -1.680365 | -1.282959 |
| O | -0.593811 | -2.621869 | -2.095972 |
| C | 0.257325  | -0.773010 | -3.531114 |
| H | 0.193330  | -0.477584 | -4.600249 |
| H | 1.324307  | -0.816613 | -3.296159 |
| C | -0.327660 | -2.193155 | -3.409101 |
| H | 0.367214  | -2.877928 | -3.929471 |
| H | -1.289346 | -2.264403 | -3.928665 |
| C | -1.750290 | 0.488449  | -2.876054 |
| H | -1.901703 | 1.263131  | -3.653751 |
| H | -2.216223 | -0.427616 | -3.247130 |
| C | -2.539526 | 0.907482  | -1.634955 |
| H | -3.534126 | 1.253406  | -1.968896 |
| H | -2.059456 | 1.758635  | -1.131674 |
| O | -2.683142 | -0.194462 | -0.757954 |
| C | -0.318103 | 0.670910  | 3.494924  |
| H | -0.528641 | 1.660812  | 3.079722  |
| H | -0.030896 | 0.821880  | 4.558926  |
| C | -1.624019 | -0.138217 | 3.521486  |
| H | -2.355538 | 0.430330  | 4.121925  |
| H | -1.467543 | -1.093118 | 4.033643  |
| O | -2.172082 | -0.469878 | 2.259342  |
| C | -3.535863 | 0.042472  | 0.350087  |
| H | -4.348161 | 0.731226  | 0.064844  |
| H | -3.984984 | -0.922591 | 0.609459  |
| C | -2.840119 | 0.591903  | 1.594650  |
| H | -2.140438 | 1.390610  | 1.318401  |
| H | -3.606462 | 1.022083  | 2.264505  |
| N | 0.131830  | 2.038085  | 0.365120  |
| N | -0.145609 | 3.155738  | -0.079919 |
| N | -0.542987 | 4.178465  | -0.401329 |

B3LYP / 6-31G(d) : -1355.272752

B3LYP / 6-31G(d) + ZPE: -1354.754804

Calculated geometry (B3LYP / 6 -31G(d)) of cryptand 2xK<sup>+</sup>

|   |           |           |           |
|---|-----------|-----------|-----------|
| H | -3.080235 | 2.584289  | 3.292888  |
| C | -2.382479 | 2.384778  | 2.485517  |
| C | -0.597554 | 1.979681  | 0.398600  |
| C | -1.012265 | 2.331901  | 2.740827  |
| C | -2.855738 | 2.148031  | 1.195400  |
| C | -1.979686 | 1.906998  | 0.130652  |
| C | -0.095828 | 2.109399  | 1.707587  |
| H | -0.643292 | 2.484588  | 3.751923  |
| H | -3.926373 | 2.141406  | 1.006785  |
| C | 1.391850  | 1.973919  | 1.971370  |
| H | 1.644612  | 2.434159  | 2.940212  |
| H | 1.946107  | 2.520489  | 1.205430  |
| C | -2.514268 | 1.464642  | -1.223275 |
| H | -3.582533 | 1.720560  | -1.282444 |
| H | -2.035463 | 2.002229  | -2.043308 |
| N | 1.843750  | 0.553167  | 1.933120  |
| N | -2.302811 | 0.006664  | -1.443859 |
| C | -3.332468 | -0.807068 | -0.762798 |
| H | -4.149231 | -1.054357 | -1.460456 |
| H | -3.761763 | -0.204104 | 0.041233  |
| C | -2.850675 | -2.107054 | -0.122703 |
| H | -2.329296 | -2.748062 | -0.849046 |
| H | -3.733059 | -2.653719 | 0.241107  |
| O | -1.989857 | -1.790048 | 0.974248  |
| C | -1.762321 | -2.857920 | 1.890539  |
| H | -2.705123 | -3.155048 | 2.373012  |
| H | -1.352098 | -3.738364 | 1.371693  |
| C | -0.784626 | -2.383604 | 2.952636  |
| H | -0.706210 | -3.146107 | 3.741045  |
| H | -1.159544 | -1.453610 | 3.402407  |
| O | 0.489359  | -2.180249 | 2.340411  |
| C | 1.536946  | -0.107418 | 3.220337  |
| H | 2.247463  | 0.202674  | 4.009030  |
| H | 0.549196  | 0.241125  | 3.537319  |
| C | 1.511502  | -1.640396 | 3.182918  |
| H | 1.390986  | -2.013180 | 4.209369  |
| H | 2.452413  | -2.047150 | 2.799435  |
| C | 3.275773  | 0.456380  | 1.579992  |
| H | 3.865928  | 1.241740  | 2.083647  |
| H | 3.661162  | -0.502666 | 1.937587  |
| C | 3.571233  | 0.527711  | 0.078961  |
| H | 4.659785  | 0.599671  | -0.058095 |
| H | 3.108172  | 1.413413  | -0.374938 |
| O | 3.090550  | -0.668041 | -0.547215 |
| C | -2.059431 | -0.379412 | -2.835066 |
| H | -1.807041 | 0.499245  | -3.439415 |
| H | -2.933648 | -0.867644 | -3.283748 |
| C | 0.277323  | -0.889659 | -3.250419 |
| N | -0.063997 | -1.297127 | -4.384651 |
| N | -0.951082 | -1.377025 | -2.875903 |
| O | 1.219277  | -0.357725 | -2.499187 |
| C | 3.481944  | -0.896672 | -1.895657 |
| H | 4.530002  | -0.609476 | -2.062787 |
| H | 3.399358  | -1.978234 | -2.042347 |
| C | 2.600367  | -0.180978 | -2.927075 |
| H | 2.769979  | 0.897391  | -2.957874 |
| H | 2.747724  | -0.598986 | -3.926714 |
| K | 0.371200  | -1.030935 | -0.034860 |
| N | 0.394203  | 1.816778  | -0.622525 |
| N | 0.290346  | 2.422078  | -1.696484 |
| N | 0.344876  | 2.896101  | -2.732086 |

B3LYP / 6-31G(d) : -2063.3113301

B3LYP / 6-31G(d) + ZPE: -2062.806435
